# Supplementary material for: Epigenome-wide DNA methylation regulates cardinal pathological features of psoriasis
Source: Clin Epigenetics. 2018 Aug 9;10:108. doi: 10.1186/s13148-018-0541-9 (PMC6085681; doi:10.1186/s13148-018-0541-9)

Figure S1.

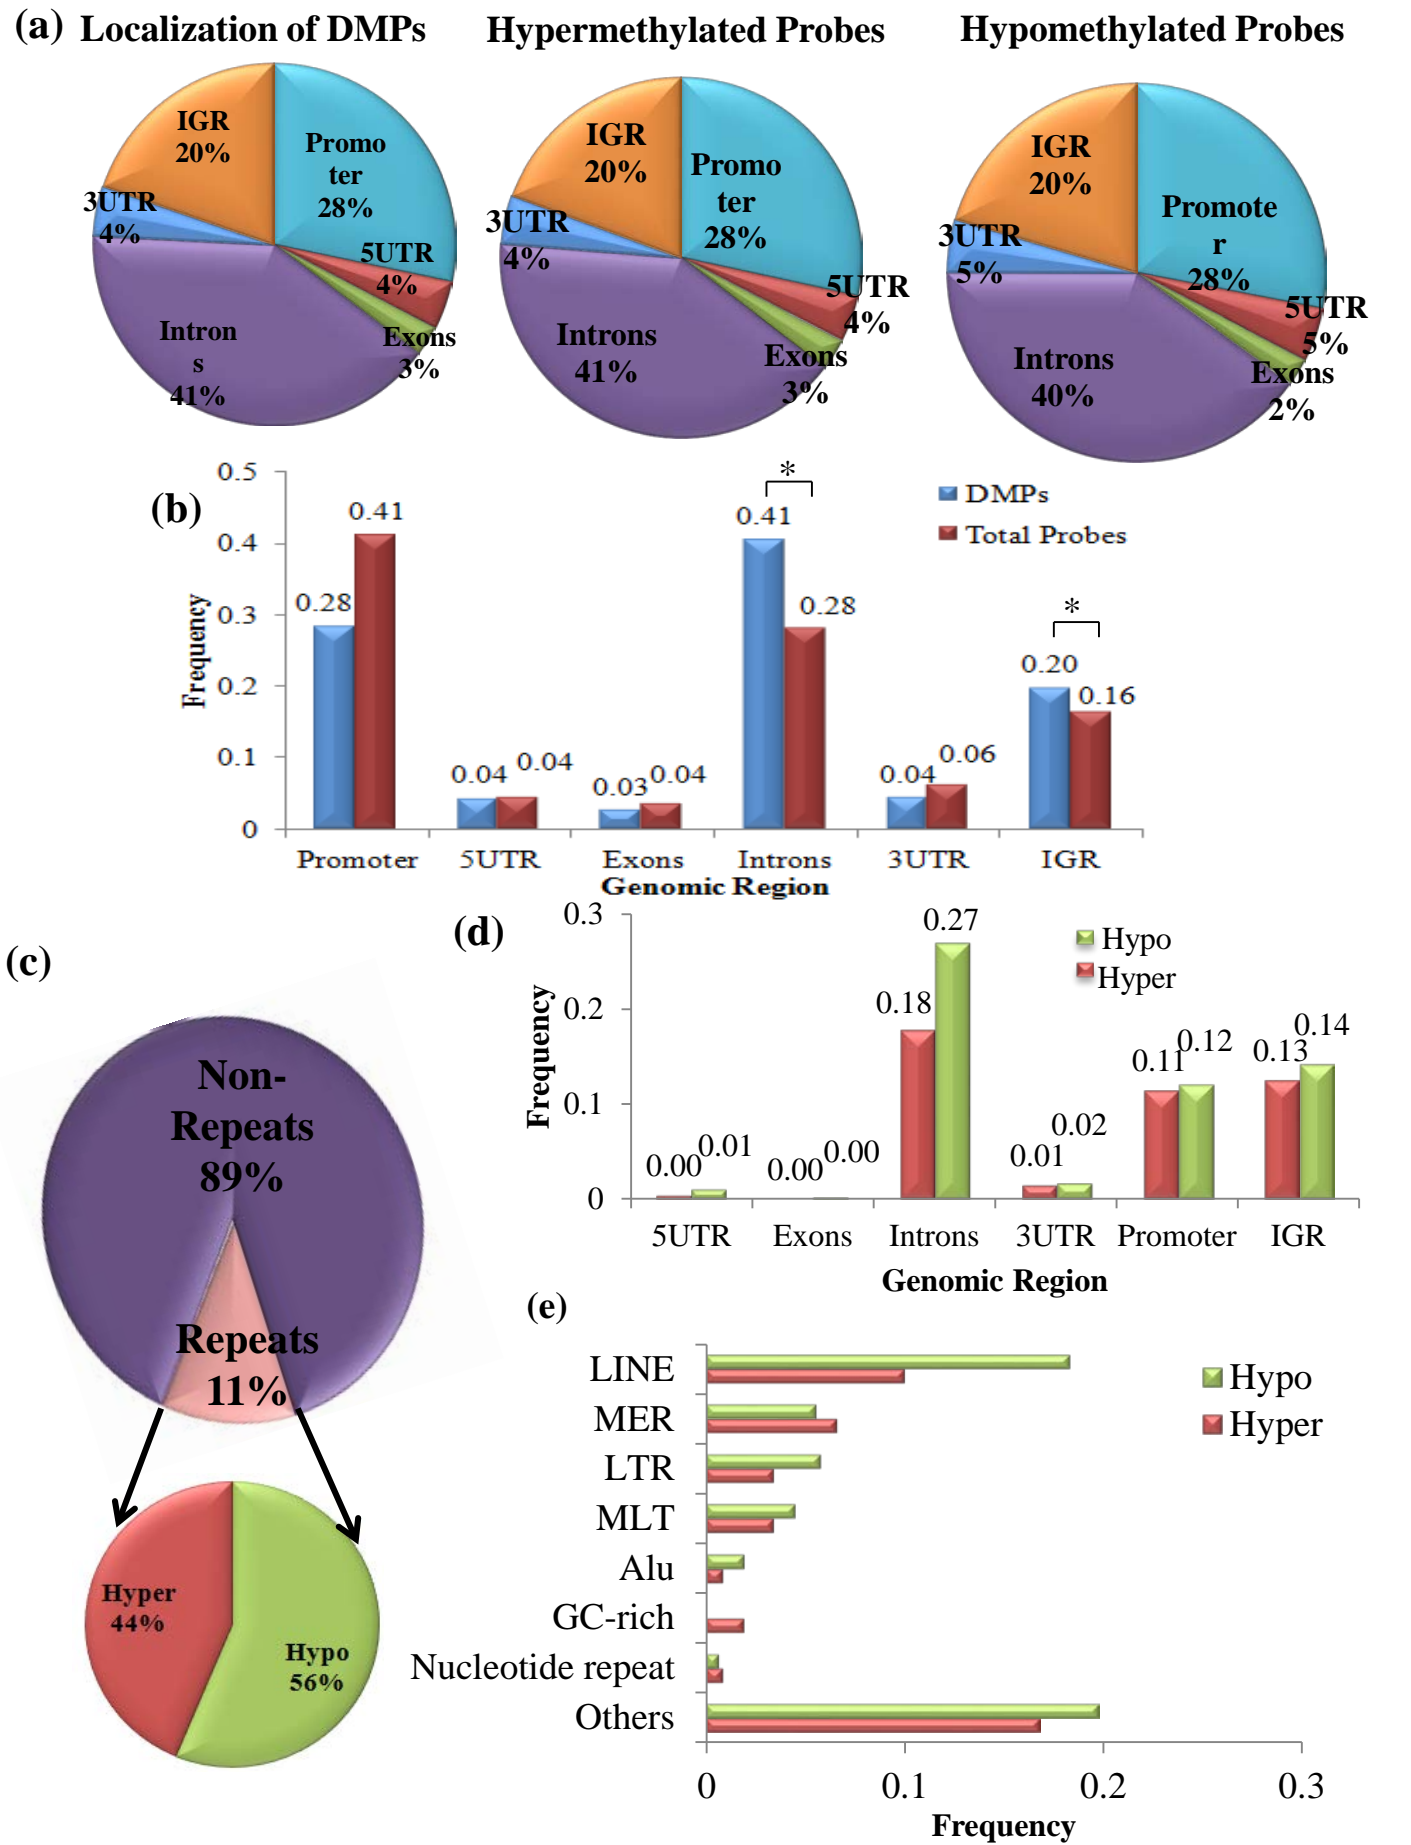

**Figure S2.**

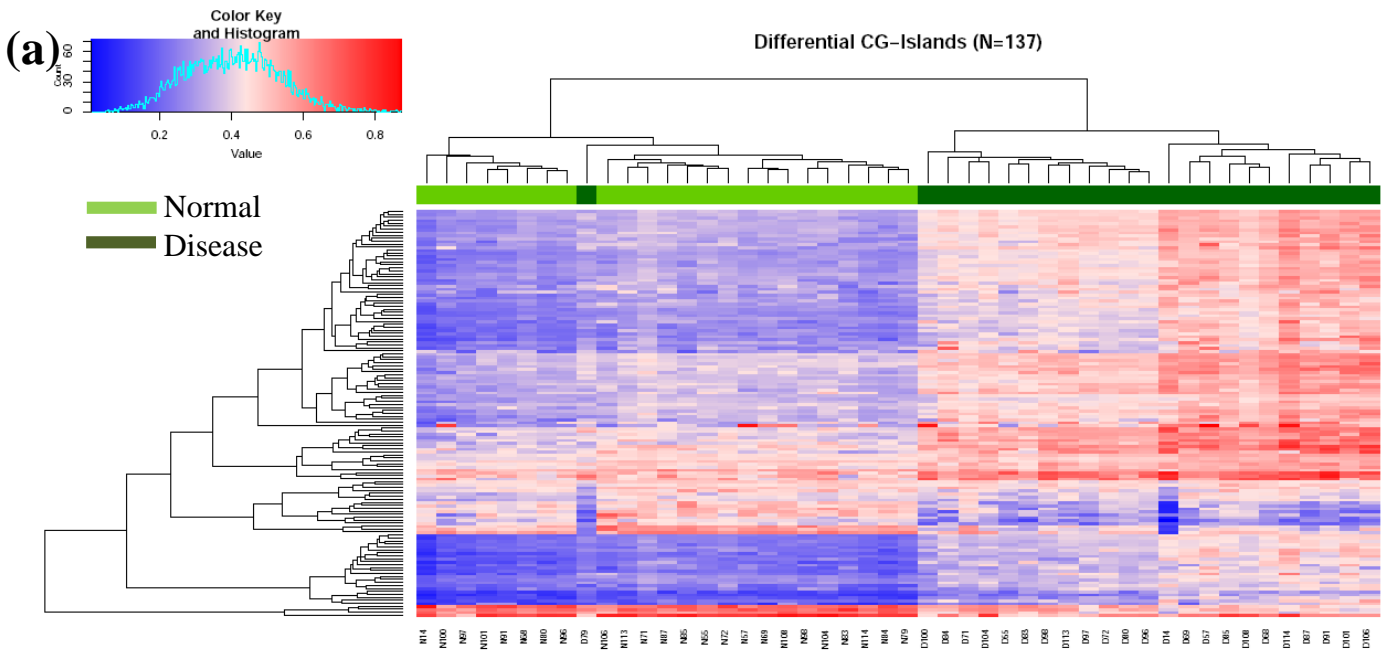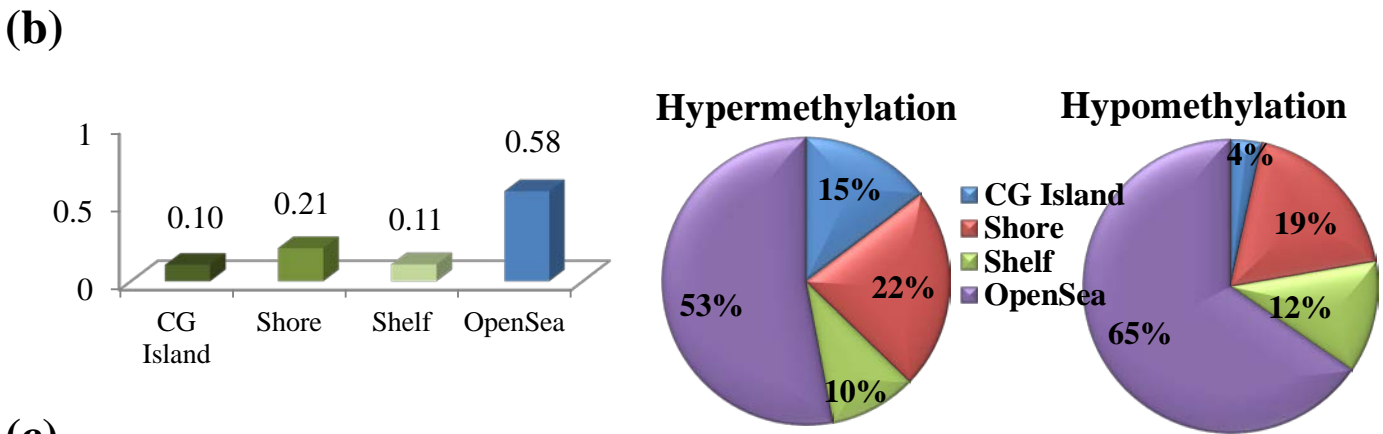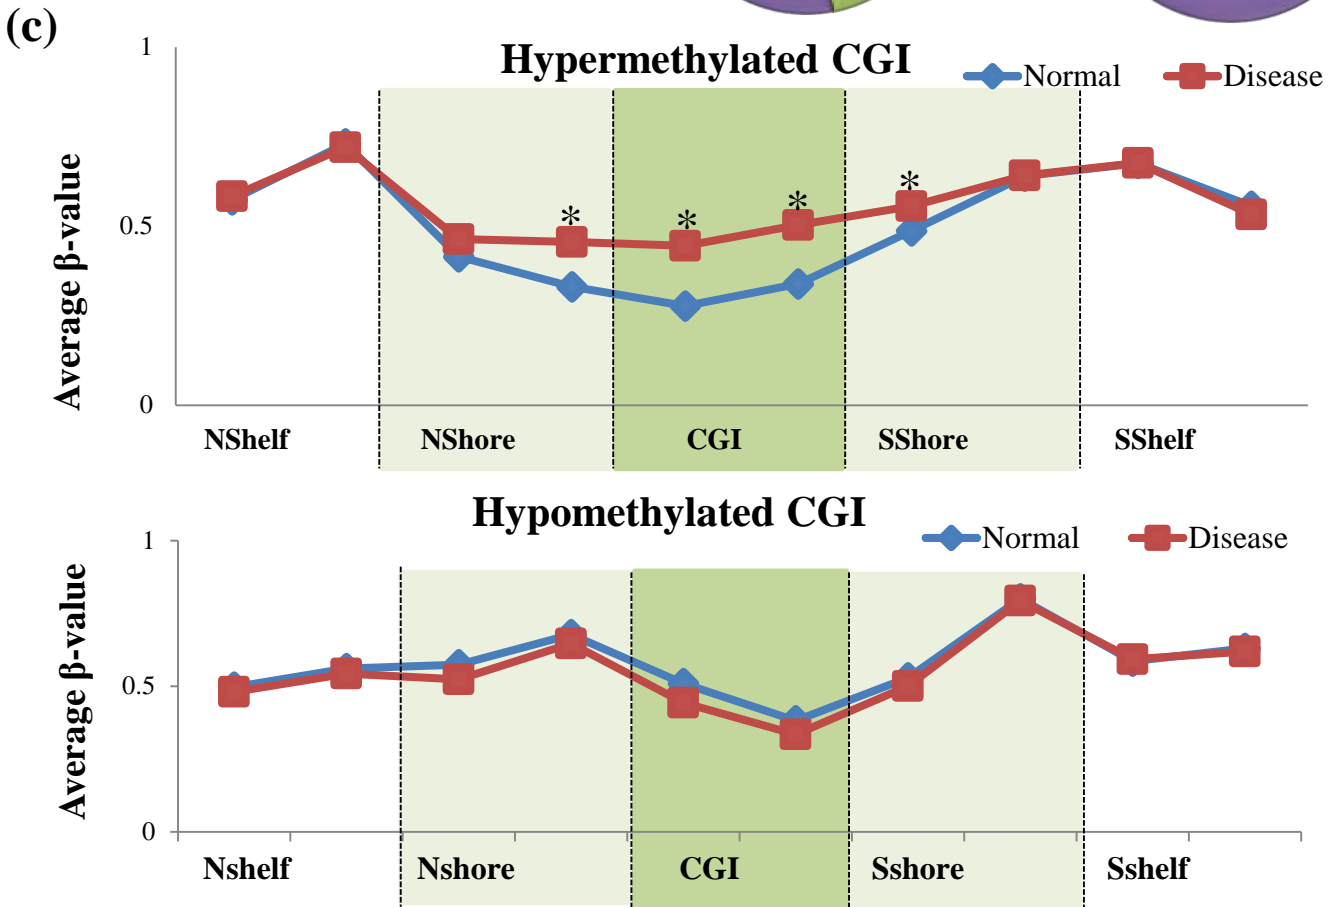

Figure S3.

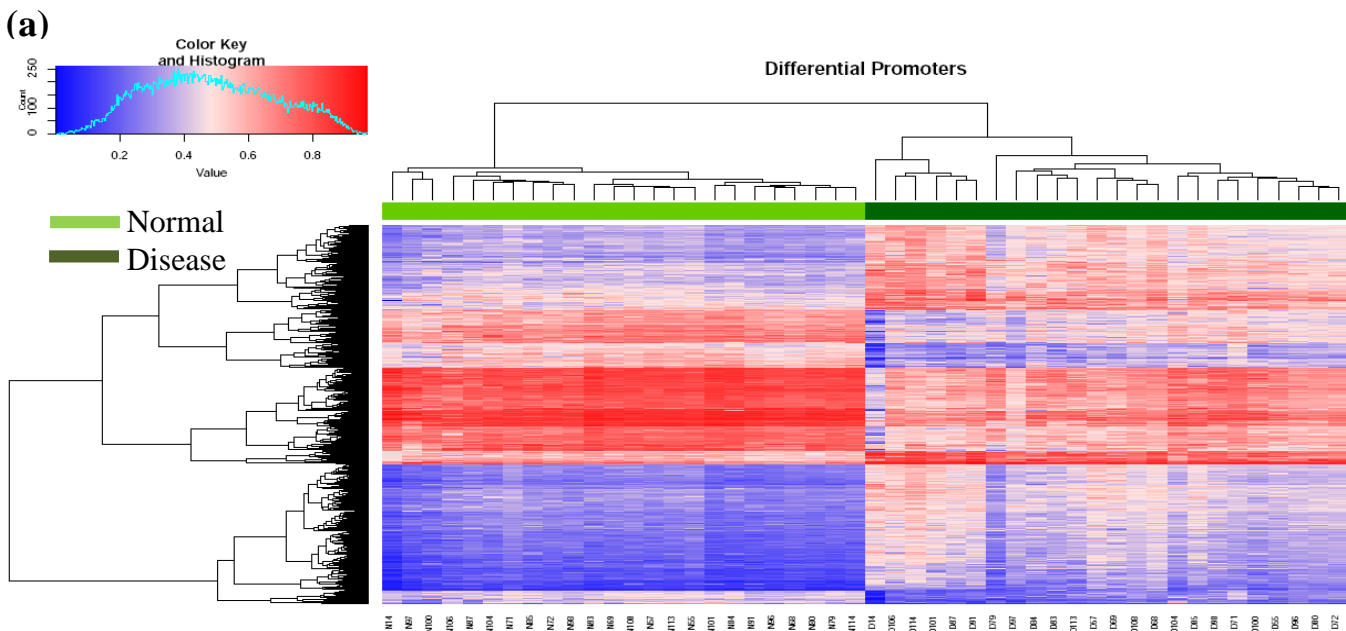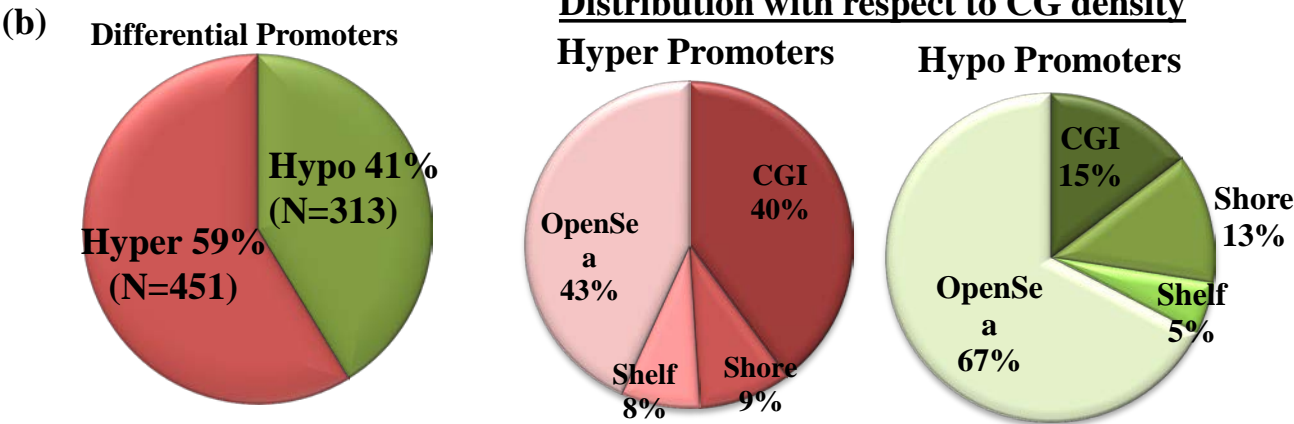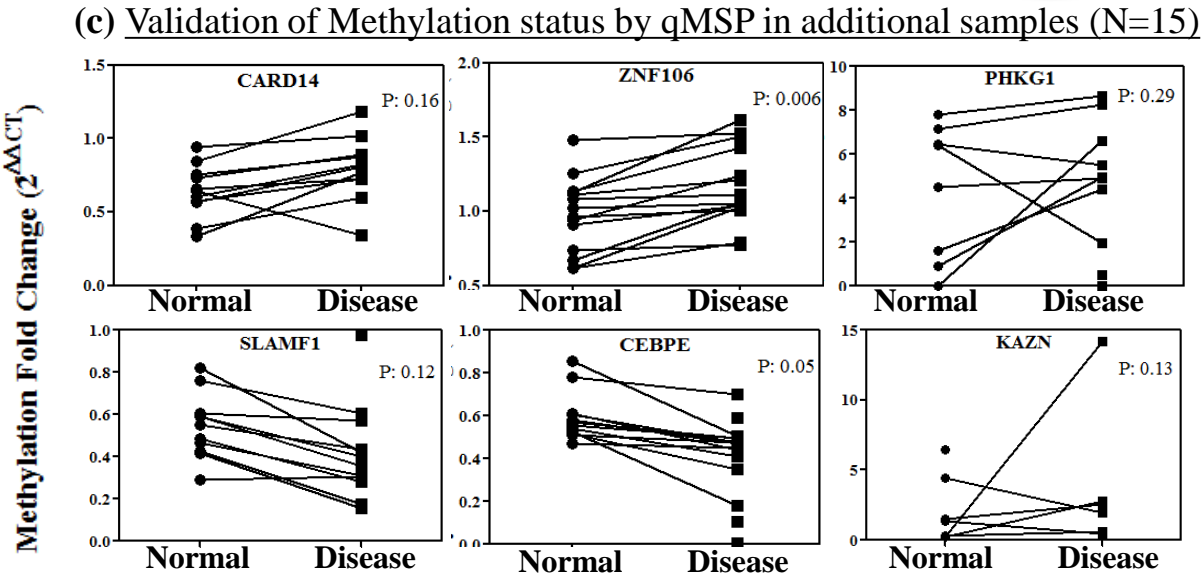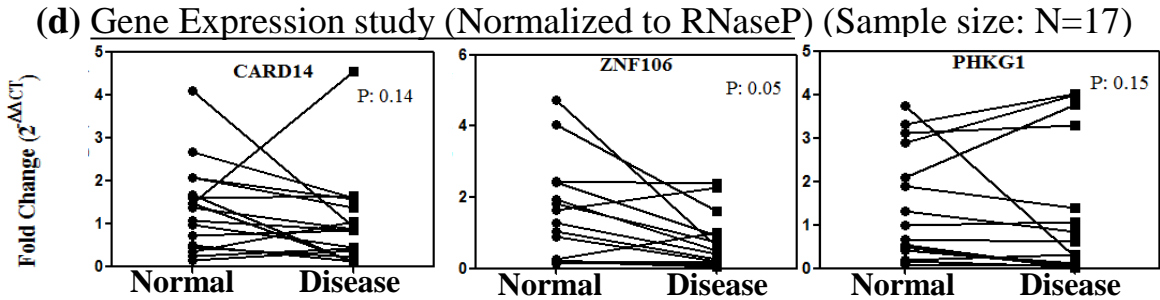

## Figure S4.

Verification of complete methylation of promoter-pCpGL constructs

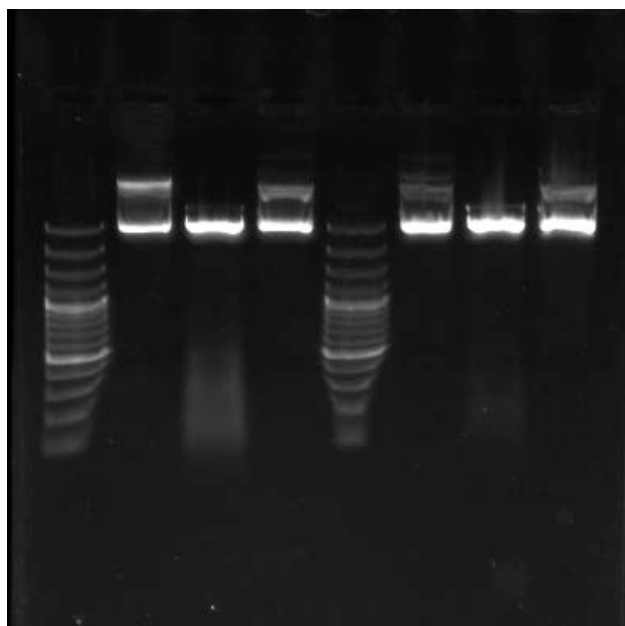

Lane1: 100bp ladder; 2: SELENBP1 unmethylated uncut construct; 3: SELENBP1 unmethylated cut; 4: SELENBP1 methylated cut

Lane5: 100bp ladder; 6: S100A9 unmethylated uncut construct; 7: S100A9 unmethylated cut; 8: S100A9 methylated cut

### Figure S5.

(a) Normal

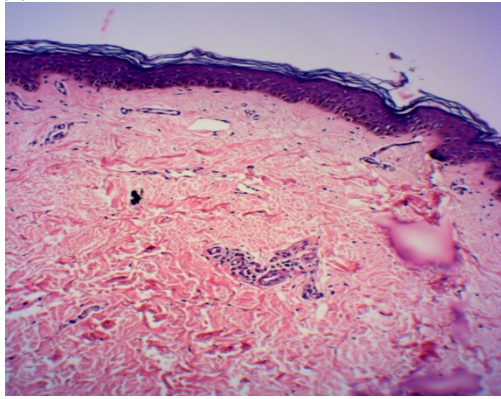

- Stratum corneum
- Uniform epidermis
- Elongated Rete-pegs
- Accumulation of immune cells
- Dilated blood vessel

Disease

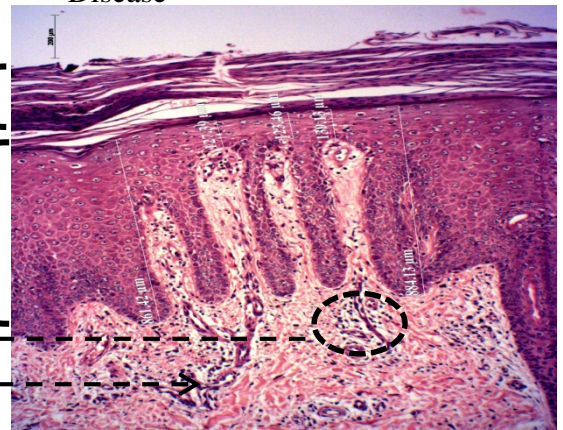

**(b) 40X magnification image of Stratum Corneum**

### Without Munro's microabscess

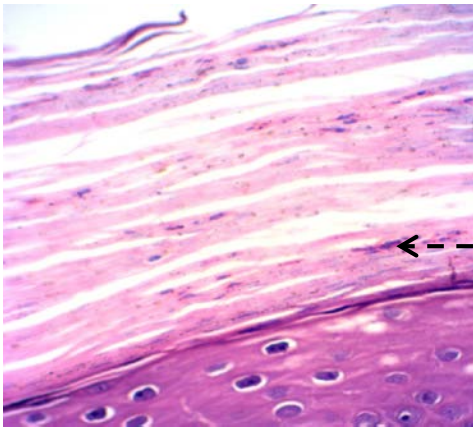

### With Munro's microabscess

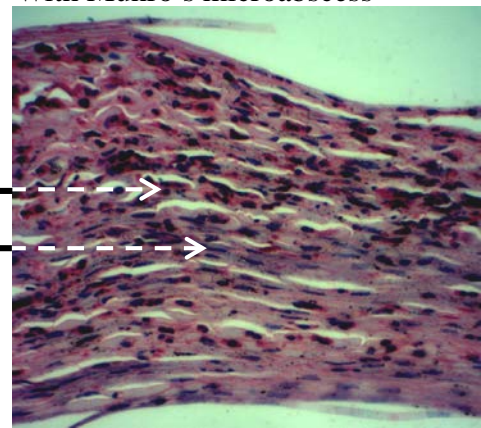

neutrophil

← - - - parakeratosis

**(c) 40X magnification image of junction of Stratum Corneum and Stratum Spinosum**

With spongiform Kogoj's microabscess

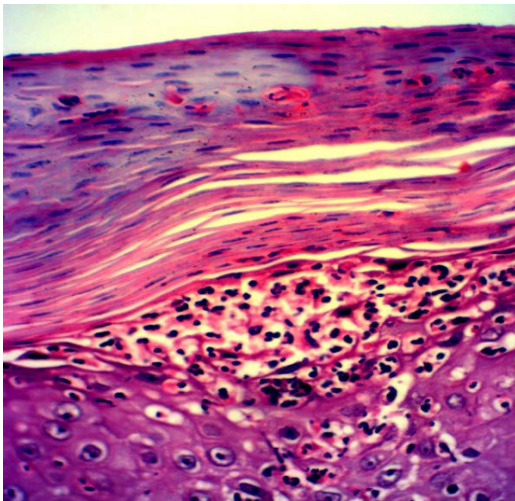

With focal Hyper-granulosis

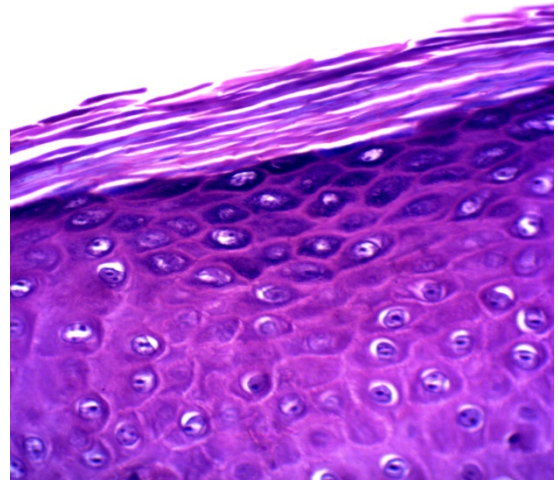

Figure S6.

(a)

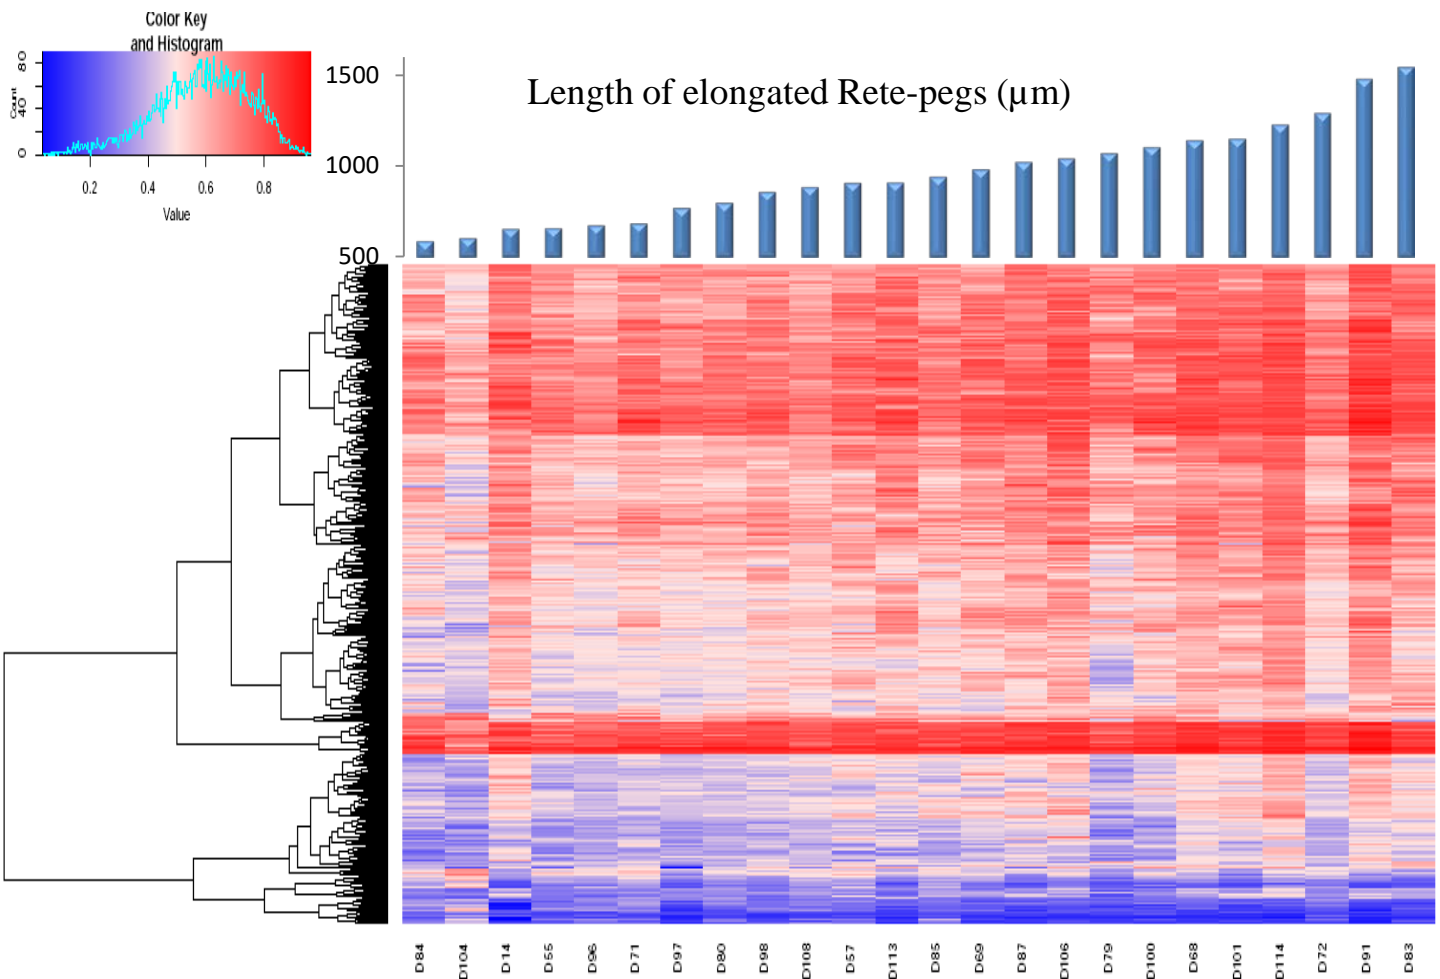

(b)

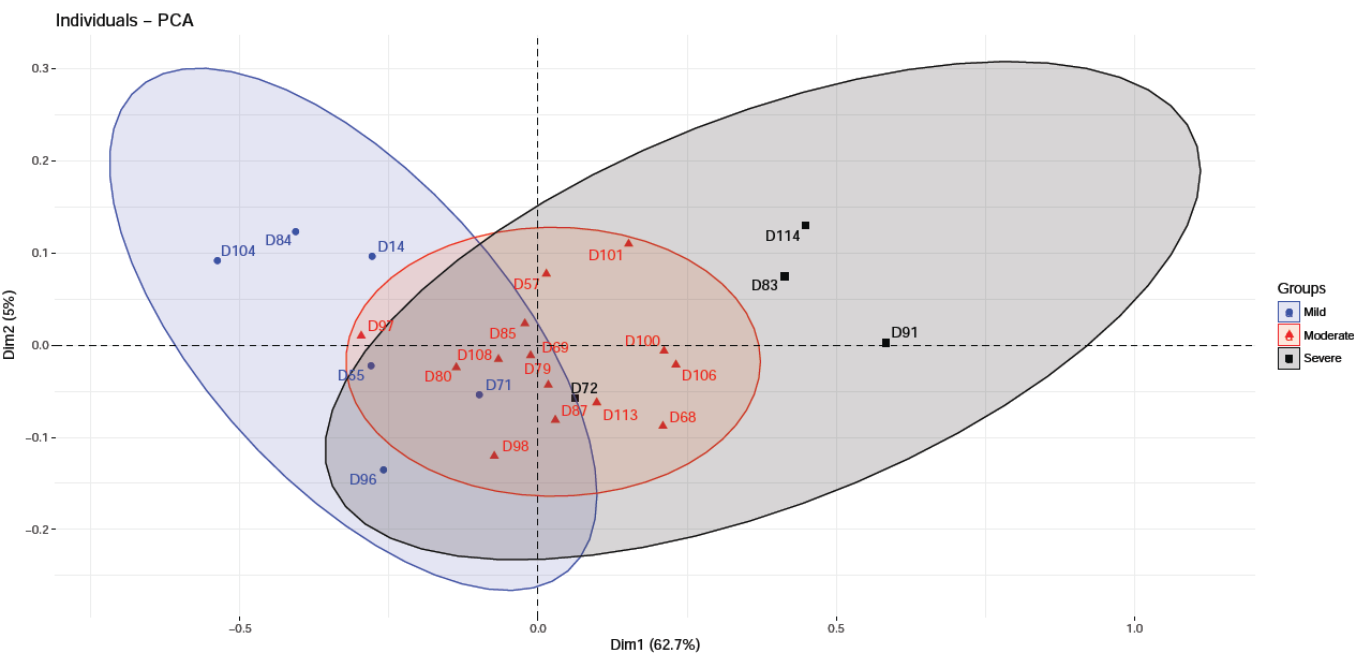

Supplement: Supplementary file 2 — Figure S1. Characterisation of DMPs. (a) Distribution of DMPs across different genomic regions; separate study of localization of hyper- and hypomethylated DMPs. (b) Figure showing comparison of frequency of DMPs and total probes in 450 k array across different genomic regions. *Indicates significantly enriched regions according to hypergeometric test. (c) Overlap of DMPs across regions containing repeat elements, (d) their distribution over genomic regions and (e) sub-classification into different types of repeat elements. Figure S2. Characterisation of differential CGI. (a) Hierarchical clustering of differential CGI. Normal samples are marked in light green and disease samples are marked with dark green. (b) Distribution of DMPs over CGI and associated regions (shores and shelves) and non-CGI regions (Open Sea); separate classification of hyper- and hypomethylated DMPs across CGI and associated regions. (c) Extent of hyper- and hypomethylation over CGI and associated shores and shelves. Figure S3. Characterisation of differential promoters. (a) Heatmap of differentially methylated promoters. Normal samples are marked in light green and disease samples are marked with dark green. (b) Classification of differential promoters into hyper- and hypomethylation; overlap of hyper- and hypomethylayed promoters with CGI and associated regions and non-CGI regions. (c) Validation of candidate promoter methylation in additional samples by qMSP. (d) Gene expression analysis of corresponding genes between disease and adjacent normal samples. Figure S4. Verification of complete methylation of promoter-pCpGL constructs. Unmethylated and methylated promoter constructs were digested with methylation sensitive restriction enzymes (HinP1I, AciI, HpaII) and run on 1% agarose gel. Lane1: 100 bp ladder; 2: SELENBP1 unmethylated uncut construct; 3: SELENBP1 unmethylated cut; 4: SELENBP1 methylated cut; Lane5: 100 bp ladder; 6: S100A9 unmethylated uncut construct; 7: S100A9 unmethylated c [file 13148_2018_541_MOESM2_ESM.pdf]
